# Supplementary material
Source: publisher figshare collection journal article supplement (https://acs.figshare.com/ndownloader/files/23728276)
Supplement: Supplementary file 1 [file 23728276]

## Sheet: pH 7.39
Peptide	Start	End	Z	RT	3s(1)	3s(2)	3s(3)	3s(4)	15s(1)	15s(2)	15s(3)	15s(4)	60s(1)	60s(2)	60s(3)	60s(4)	300s(1)	300s(2)	300s(3)	300s(4)	1800s(1)	1800s(2)	1800s(3)	1800s(4)	14400s(1)	14400(2)	14400(3)	14400(4)	72000s(1)	72000(2)	72000s(3)	72000s(4)	TD
GRKTGQAPGFT	37	47	2	5.36	1.353	1.571	1.459	1.646	1.577	1.665	1.575	1.765	1.646	1.687	1.659	1.806	2.276	2.404	2.508	3.039	3.566	3.464	3.566	3.521	4.93	5.115	4.846	4.866	4.914	5.18	4.8	4.696
TYTDANKNKGITWKEETLME	47	66	3	7.4	1.939	2.346	2.221	2.227	3.286	3.368	3.344	3.577	4.382	4.229	4.351	4.558	5.674	5.735	5.624	6.665	8.32	8.332	8.126	8.318	9.306	9.535	9.134	9.521	10.135	10.08	9.897	9.838
YTDANKNKGITWKEETL	48	64	2	6.85	1.794	2.124	2.186	2.105	3.057	3.107	3.183	3.385	4.051	4.065	4.061	4.17	5.199	5.31	5.238	6.163	7.293	7.441	7.18	7.373	7.942	8.095	7.825	8.007	8.49	8.487	8.186	8.186	10.389
YTDANKNKGITWKEETLME	48	66	3	7.31	1.807	2.086	2.078	2.127	3.112	3.13	3.084	3.318	4.064	4.057	4.081	4.204	5.266	5.303	5.205	6.171	7.428	7.509	7.278	7.442	8.279	8.618	8.234	8.462	9.13	9.161	8.838	8.88	11.721
MEYLENPKKYIPGTKM	65	80	2	7.21	0.734	0.858		0.797	0.771	0.888	0.745	1.043	1.076	1.135	1.019	1.295	2.106	2.14	2.176	2.391	2.969	2.97	2.972	2.941	5.036	5.172	4.923	5.133	6.321	6.294	6.087	5.982	8.891
MEYLENPKKYIPGTKMIFAGIKKKTEREDL	65	94	3	8.28	5.218	5.767	5.782	5.79	6.835	6.838	6.793	7.217	7.869	7.92	7.861	8.054	10.152	10.18	10.043	10.622	11.578	11.462	11.152	11.404	13.974	14.371	13.778	14.098	15.639	15.541	15.08	14.844	20.162
EYLENPKKYIPGTKM	66	80	2	6.63	0.705	0.804	0.694	0.845	0.688	0.861	0.668	1.04	0.963	1.11	0.979	1.057	2.008	1.992	2.056	2.415	2.843	2.84	2.856	2.902	4.883	5.057	4.805	4.928	6.037	6.035	5.836	5.684	8.076
EYLENPKKYIPGTKMIF	66	82	3	8.54	1.266	1.557	1.481	1.524	1.853	1.943	1.837	2.096	2.467	2.546	2.435	2.632	3.999	4.043	4.04	4.34	4.85	4.844	4.816	4.826	6.771	6.974	6.701	6.813	7.917	7.902	7.722	7.53	9.773
YLENPKKYIPGTKM	67	80	2	6.43	0.626	0.799	0.643	0.794	0.689	0.802	0.64	0.967	1.013	1.068	0.924	1.138	2.077	2.084	2.055	2.401	2.782	2.878	2.876	2.854	5.012	5.147	4.938	4.947	6.147	6.159	5.996	5.757	7.238
YLENPKKYIPGTKMIF	67	82	2	8.28	1.318	1.541	1.487	1.529	1.859	1.932	1.84	2.12	2.486	2.531	2.426	2.683	4.062	4.055	4.071	4.382	4.948	4.859	4.873	4.869	6.896	7.077	6.838	6.963	8.029	8.055	7.84	7.602	9.214
YLENPKKYIPGTKMIFAGIKKKTEREDL	67	94	3	7.61	5.184	5.593	5.663	5.692	6.683	6.827	6.661	6.996	7.797	7.847	7.771	7.959	10.057	10.034	9.862	10.584	11.435	11.32	11.118	11.272	13.805	14.295	13.643	13.886	15.225	15.321	14.858	14.48	18.406
YLENPKKYIPGTKMIFAGIKKKTEREDLIA	67	96	3	7.94	5.3	5.8	5.815	5.78	6.801	6.932	6.857	7.153	7.881	8	7.889	8.124	10.211	10.269	10.058	10.727	11.58	11.508	10.999	11.408	14.005	14.345	13.686	14.083	15.444	15.459	15.026	14.708	19.975
IFAGIKKKTEREDL	81	94	3	5.95	3.49	3.78	3.77	3.751	4.37	4.422	4.35	4.446	4.777	4.738	4.787	4.758	5.42	5.41	5.317	5.59	5.869	5.822	5.676	5.777	6.344	6.479	6.162	6.395	6.716	6.725	6.52	6.443	8.551
IFAGIKKKTEREDLIA	81	96	2	6.44	3.49	3.777	3.791	3.698	4.388	4.407	4.362	4.507	4.797	4.754	4.846	4.791	5.317	5.41	5.338	5.592	5.901	5.836	5.72	5.792	6.298	6.548	6.186	6.405	6.677	6.751	6.554	6.477	10.041
IFAGIKKKTEREDLIAYLKKATNE	81	104	3	8.48	3.482	3.746	3.711	3.845	4.908	4.508	4.421		4.391	5.361			6.485	6.221		7.103	8.113	8.123	7.925	7.593	9.541	8.996	9.113	9.481	9.665	10.092		9.913	16.829
AGIKKKTEREDL	83	94	2	5.03	2.605	2.878	2.824	2.838	3.364	3.38	3.328	3.41	3.525	3.519	3.505	3.508	3.985	3.945	3.934	4.173	4.372	4.372	4.275	4.392	4.861	5.004	4.76	4.91	5.224	5.26	5.097	5.109
AGIKKKTEREDLIA	83	96	2	5.68	2.69	2.934	2.911	2.921	3.416	3.463	3.404	3.53	3.605	3.624	3.605	3.639	4.068	4.067	4.102	4.245	4.491	4.372	4.398	4.474	4.995	5.107	4.854	5.028	5.356	5.399	5.254	5.279
AGIKKKTEREDLIAY	83	97	2	6.24	2.851	3.089	2.984	3.021	3.497	3.503	3.529	3.683	3.712	3.657	3.721	3.739	4.171	4.168	4.093	4.373	4.687	4.562	4.543	4.549	5.084	5.224	5.061	5.13	5.507	5.465	5.544	5.455	9.301
AGIKKKTEREDLIAYLKKATNE	83	104	3	7.52	2.945	3.065	3.046	3.305	3.686	3.765	3.647	4.077	4.083	4.426	4.235	4.425	5.444	5.265	5.161	5.614	6.747	6.481	6.474	6.545	8.334	8.567	7.962	8.473	9.083	9.066	8.608	8.915	15.11
IKKKTEREDL	85	94	2	4.97	1.514	1.797	1.91	1.681	2.198	2.182	2.03	2.302	2.326	2.401	2.445	2.359	2.684	2.68	2.735	3.018	2.966	2.868	2.879	2.903	2.927	2.981	2.94	2.966	3.429	3.427	3.168	3.322
IKKKTEREDLIA	85	96	2	5.51	1.627	1.885	2.005	1.582	2.372	2.462	1.945	2.427	2.479	2.388	2.605	2.647	2.767	2.938	2.815	3.12	3.131	2.972	3.012	3.212	3.201	2.976	2.878	3.257	3.635	3.512	3.372	3.498
IAYLKKATNE	95	104	2	5.67	0.416	0.599	0.495	0.549	0.593	0.727	0.601	0.963	1.013	1.14	1.081	1.291	1.722	1.687	1.8	2.034	2.49	2.409	2.533	2.542	3.607	3.672	3.581	3.685	3.965	3.992	3.816	3.872	6.391
YLKKATNE	97	104	2	4.61	0.382	0.474	0.411	0.527	0.509	0.581	0.534	0.73	0.948	1.015	0.932	1.1	1.541	1.572	1.597	1.793	2.194	2.242	2.306	2.317	3.28	3.439	3.315	3.397	3.605	3.59	3.498	3.481	3.999
LKKATNE	98	104	2	4.28	0.115	0.159	0.16	0.178	0.2	0.321	0.227	0.388	0.588	0.687	0.611	0.738	1.192	1.199	1.215	1.452	1.856	1.794	1.759	1.922	2.892	2.954	2.876	3.066	3.092	3.186	2.896	3.053

## Sheet: pH 7.94
Peptide	Start	End	Z	RT	3s(1)	3s(2)	3s(3)	3s(4)	15s(1)	15s(2)	15s(3)	15s(4)	60s(1)	60s(2)	60s(3)	60s(4)	300s(1)	300s(2)	300s(3)	300s(4)	1800s(1)	1800s(2)	1800s(3)	1800s(4)	14400s(1)	14400(2)	14400(3)	14400(4)	72000s(1)	72000(2)	72000s(3)	72000s(4)	TD
GRKTGQAPGFT	37	47	2	5.36	1.533	1.526	1.595	1.665	1.496	1.548	1.668	1.686	1.852	1.918	1.842	1.983	2.93	2.898	2.812	3.039	4.141	4.247	4.125	4.133	4.69	5.213	4.9	5.073	4.831	5.055	4.634	4.947
TYTDANKNKGITWKEETLME	47	66	3	7.4	2.754	2.799	2.836	2.775	4.053	3.924	4.033	4.127	4.793	4.816	4.716	4.828	6.885	6.878	6.859	6.665	8.964	8.982	8.756	9.003	9.519	9.615	9.429	9.641	10.024	10.15	9.678	10.159
YTDANKNKGITWKEETL	48	64	2	6.85	2.612	2.627	2.682	2.576	3.738	3.729	3.768	3.755	4.552	4.585	4.437	4.601	6.316	6.265	6.195	6.163	7.778	7.874	7.765	7.907	7.933	8.204	7.872	8.01	8.409	8.596	8.272	8.508	10.389
YTDANKNKGITWKEETLME	48	66	3	7.31	2.585	2.625	2.549	2.588	3.772	3.729	3.715	3.758	4.585	4.562	4.495	4.606	6.228	6.288	6.198	6.171	7.913	7.96	7.861	7.99	8.509	8.642	8.455	8.638	9.066	9.258	8.858	9.132	11.721
MEYLENPKKYIPGTKM	65	80	2	7.21	0.746	0.684	0.779	0.849	0.875	0.971	0.927	1.122	1.53		1.265	1.638	2.593	2.482	2.424	2.391	3.388	3.333	3.321	3.299	4.931	5.005	4.905	4.909	6.218	6.336	6.007	6.18	8.894
MEYLENPKKYIPGTKMIFAGIKKKTEREDL	65	94	3	8.28	6.242	6.462	6.323	6.459	7.407	7.4	7.341	7.562	9.089	9	8.692	8.998	10.719	10.785	10.574	10.622	12.121	12.026	11.862	12.132	14.016	14.074	13.802	13.842	15.76	16.058	15.362	15.396	20.162
EYLENPKKYIPGTKM	66	80	2	6.63	0.719	0.7	0.725	0.815	0.805	0.945	0.883	1.045	1.421	1.444	1.272	1.56	2.512	2.36	2.223	2.415	3.228	3.245	3.233	3.247	4.76	4.89	4.64	4.691	5.77	5.932	5.636	5.853	8.076
EYLENPKKYIPGTKMIF	66	82	3	8.54	1.712	1.748	1.694	1.817	2.153	2.217	2.114	2.321	3.306	3.229	3.069	3.33	4.486	4.394	4.222	4.34	5.164	5.149	5.129	5.148	6.589	6.71	6.509	6.556	7.623	7.849	7.505	7.696	9.773
YLENPKKYIPGTKM	67	80	2	6.43	0.699	0.699	0.639	0.812	0.776	0.925	0.868	1.008	1.499	1.442	1.26	1.605	2.478	2.397	2.305	2.401	3.327	3.349	3.29	3.292	4.829	4.964	4.785	4.816	5.957	6.054	5.793	5.935	7.238
YLENPKKYIPGTKMIF	67	82	2	8.28	1.723	1.705	1.699	1.831	2.163	2.21	2.13	2.259	3.335	3.288	3.029	3.342	4.469	4.417	4.289	4.382	5.232	5.243	5.187	5.22	6.739	6.872	6.698	6.704	7.789	7.973	7.657	7.732	9.214
YLENPKKYIPGTKMIFAGIKKKTEREDL	67	94	3	7.61	6.247	6.345	6.209	6.343	7.329	7.3	7.256	7.419	8.955	8.899	8.618	8.88	10.685	10.581	10.461	10.584	11.919	11.998	11.789	11.93	13.772	14.002	13.562	13.745	15.378	15.642	15.029	15.281	18.406
YLENPKKYIPGTKMIFAGIKKKTEREDLIA	67	96	3	7.94	6.351	6.398	6.379	6.496	7.41	7.451	7.438	7.621	9.113	9.06	8.809	8.969	10.837	10.69	10.593	10.727	12.033	12.07	11.881	12.032	13.884	14.23	13.683	13.866	15.609	15.849	14.949	15.51	19.975
IFAGIKKKTEREDL	81	94	3	5.95	4.119	4.119	4.054	4.121	4.665	4.56	4.636	4.656	5.063	5.019	4.982	4.937	5.657	5.625	5.413	5.59	6.057	6.091	5.981	6.133	6.464	6.578	6.378	6.439	7.008	7.193	6.832	7.099	8.551
IFAGIKKKTEREDLIA	81	96	2	6.44	4.059	4.161	4.083	4.129	4.715	4.545	4.629	4.649	5.045	5.01	4.972	4.977	5.62	5.608	5.53	5.592	6.012	6.066	5.958	6.079	6.413	6.574	6.352	6.474	7.006	7.229	6.867	7.101	10.041
IFAGIKKKTEREDLIAYLKKATNE	81	104	3	8.48	3.445	4	3.679	3.846		4.992		5.454	5.935		5.924	6.808		7.106	7.399	7.103	8.789	8.272	8.681	8.78	9.643	9.473	9.801	9.86	10.327	10.374	10.104	10.162	16.829
AGIKKKTEREDL	83	94	2	5.03	3.138	3.146	3.089	3.138	3.476	3.445	3.464	3.509	3.666	3.665	3.59	3.654	4.251	4.126	3.941	4.173	4.608	4.612	4.538	4.639	4.98	5.041	4.919	5.057	5.534	5.664	5.403	5.706
AGIKKKTEREDLIA	83	96	2	5.68	3.202	3.246	3.173	3.207	3.566	3.531	3.547	3.618	3.74	3.764	3.664	3.752	4.339	4.259	4.15	4.245	4.696	4.737	4.652	4.741	5.118	5.221	5.107	5.16	5.689	5.864	5.586	5.872
AGIKKKTEREDLIAY	83	97	2	6.24	3.233	3.335	3.176	3.31	3.587	3.591	3.677	3.751	3.735	3.882	3.649	3.885	4.394	4.323	4.322	4.373	4.84	4.792	4.839	4.81	5.211	5.386	5.213	5.273	5.997	5.932	5.882	6.053	9.301
AGIKKKTEREDLIAYLKKATNE	83	104	3	7.52	3.534	3.568	3.402	3.679	3.725	3.903	3.886	4.144	4.531	4.666	4.373	4.985	5.795	5.573	5.9	5.614	7.464	7.419	7.22	7.489	8.505	8.656	8.712	8.761	9.255	9.282	9.221	9.254	15.11
IKKKTEREDL	85	94	2	4.97	2.022	1.93	1.988	2.025	2.409	2.335	2.262	2.34	2.459	2.592	2.446	2.525	2.882	2.914	2.909	3.018	2.929	2.91	2.881	2.958	3.083	3.366	3.142	3.116	3.697	3.752	3.562	3.872
IKKKTEREDLIA	85	96	2	5.51	2.346	2.226	2.041	2.379	2.429	2.41	2.347	2.596	2.779	2.344	2.476	2.474	3.086	3.079	2.798	3.12	3.07	3.347	2.939	2.704	3.253	3.417	3.283	3.431	3.813	3.909	3.819	4.422
IAYLKKATNE	95	104	2	5.67	0.433	0.44	0.504	0.673	0.731	0.851	0.76	1.002	1.305	1.394	1.206	1.537	2.13	1.981	2.052	2.034	3.091	3.018	3.045	3.046	3.817	3.91	3.859	3.861	3.837	3.932	3.804	4.068	6.391
YLKKATNE	97	104	2	4.61	0.425	0.445	0.411	0.518	0.688	0.79	0.708	0.821	1.213	1.219	1.155	1.324	1.927	1.808	1.72	1.793	2.757	2.852	2.811	2.805	3.482	3.678	3.489	3.581	3.585	3.631	3.465	3.65	3.999
LKKATNE	98	104	2	4.28	0.164	0.189	0.157	0.246	0.387	0.423	0.406	0.416	0.88	0.967	0.833	0.92	1.71	1.391	1.411	1.452	2.384	2.354	2.355	2.423	3.078	3.183	3.089	3.149	3.081	3.156	3.011	3.344

## Sheet: Statistics
Data Set (Pepsin)	0.1 mg/mL Cytochrome C	0.1 mg/mL Cytochrome C
HDX reaction details	pH 7.39, 22°C, 85% D2O	pH 7.94, 22°C, 85% D2O
HDX time course	3s, 15s, 1min, 5min, 30min, 4hr, 20hr	3s, 15s, 1min, 5min, 30min, 4hr, 20hr
HDX controls	Undeuterated, fully deuterated	Undeuterated, fully deuterated
Back-exchange	17% based on the fully deuterated angiotensin II standard	17% based on the fully deuterated angiotensin II standard
Number of peptides	24	24
Sequence coverage	0.63	0.63
Average peptide length / Redundancy	Avg peptide length: 16.5 residues	Avg peptide length: 16.5 residues
	redundancy 3.4 peptides/residue	redundancy 3.4 peptides/residue
Replicates (biological or technical)	quadruplicate biological replicates	quadruplicate biological replicates
Repeatability	average error	average error
Significant differences in HDX	standard deviation from quadruplicates	standard deviation from quadruplicates
